# Supplementary material for: Is deoxygenation detectable before warming in the thermocline?
Source: Copernicus journal article supplement (doi:10.5194/bg-2019-339), 2019-09-03
Supplement: Supplementary file 1 [file bg-2019-339-supplement.pdf]

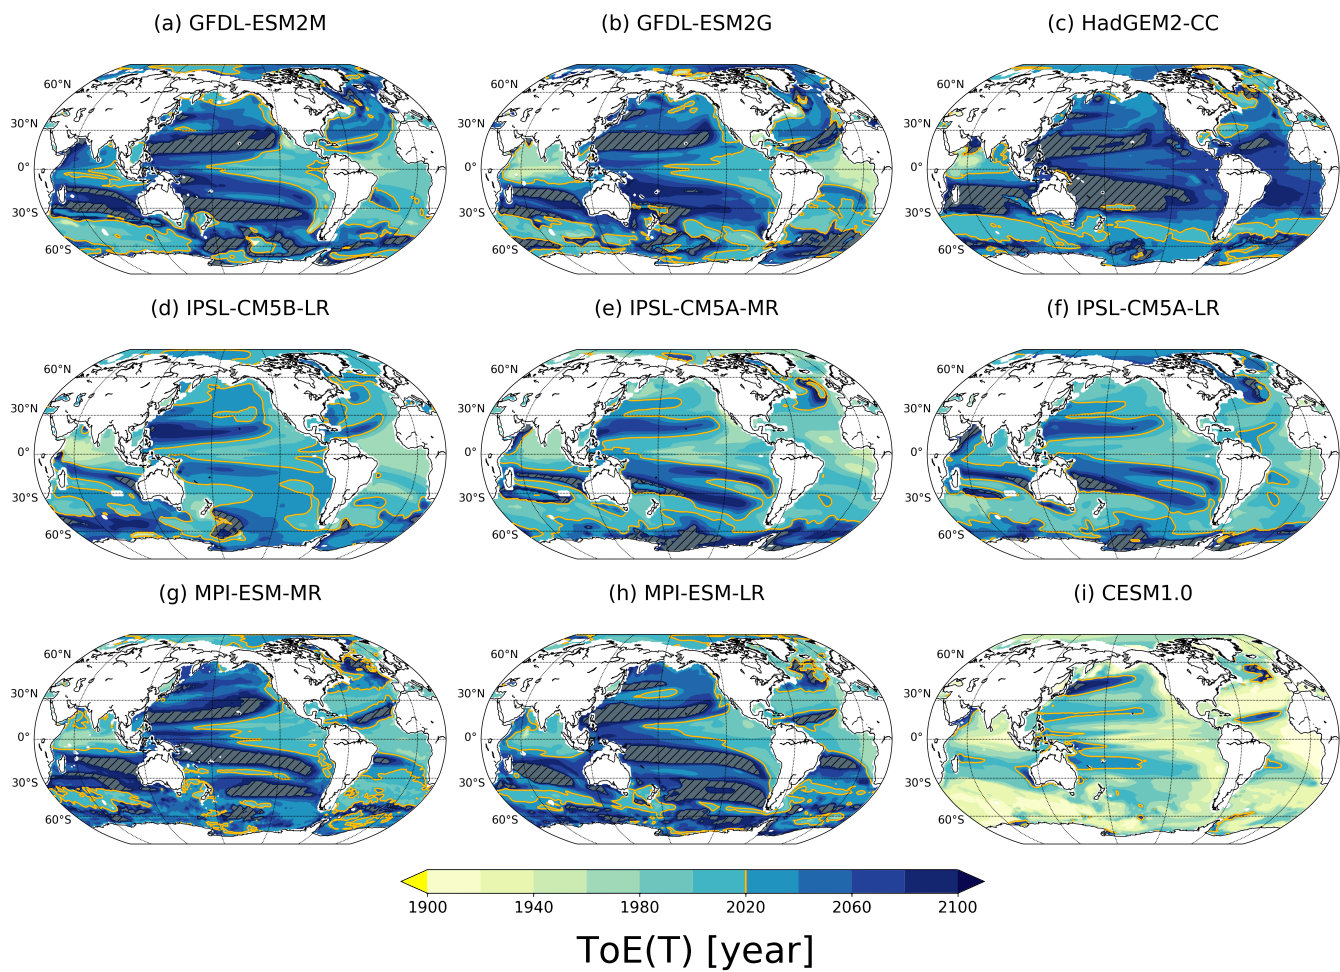

**Figure S1.** Time of Emergence (ToE) of T in the thermocline (200 – 600 m). The hatches areas represent the regions where the signal has not emerged by the end of the 21st century. The yellow contours highlight the present time (year: 2020).

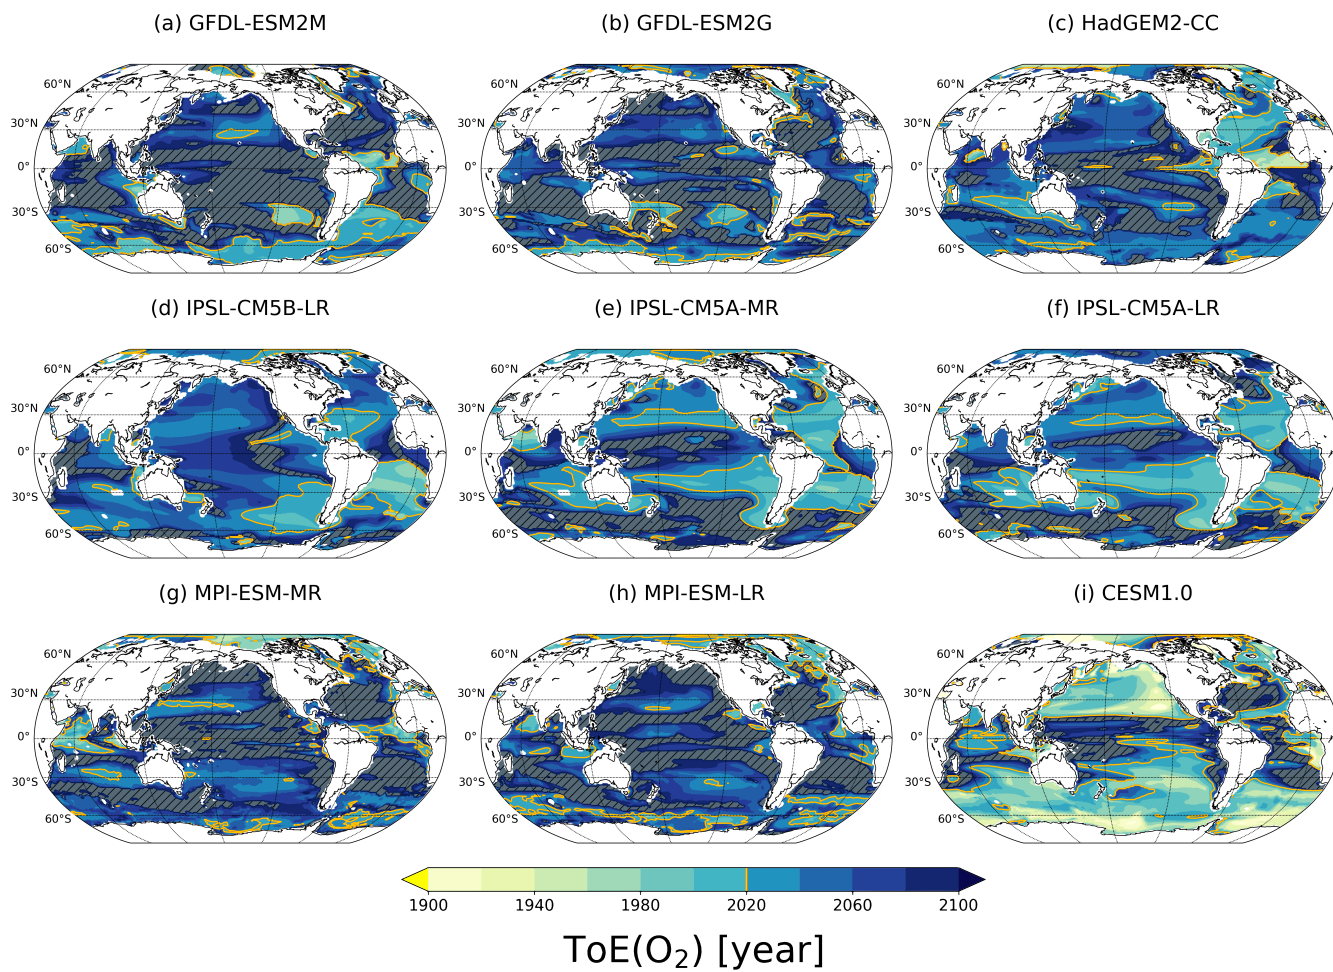

**Figure S2.** Time of Emergence (ToE) of O<sub>2</sub> in the thermocline (200 – 600 m). The hatches areas represent the regions where the signal has not emerged by the end of the 21st century. The yellow contours highlight the present time (year: 2020)

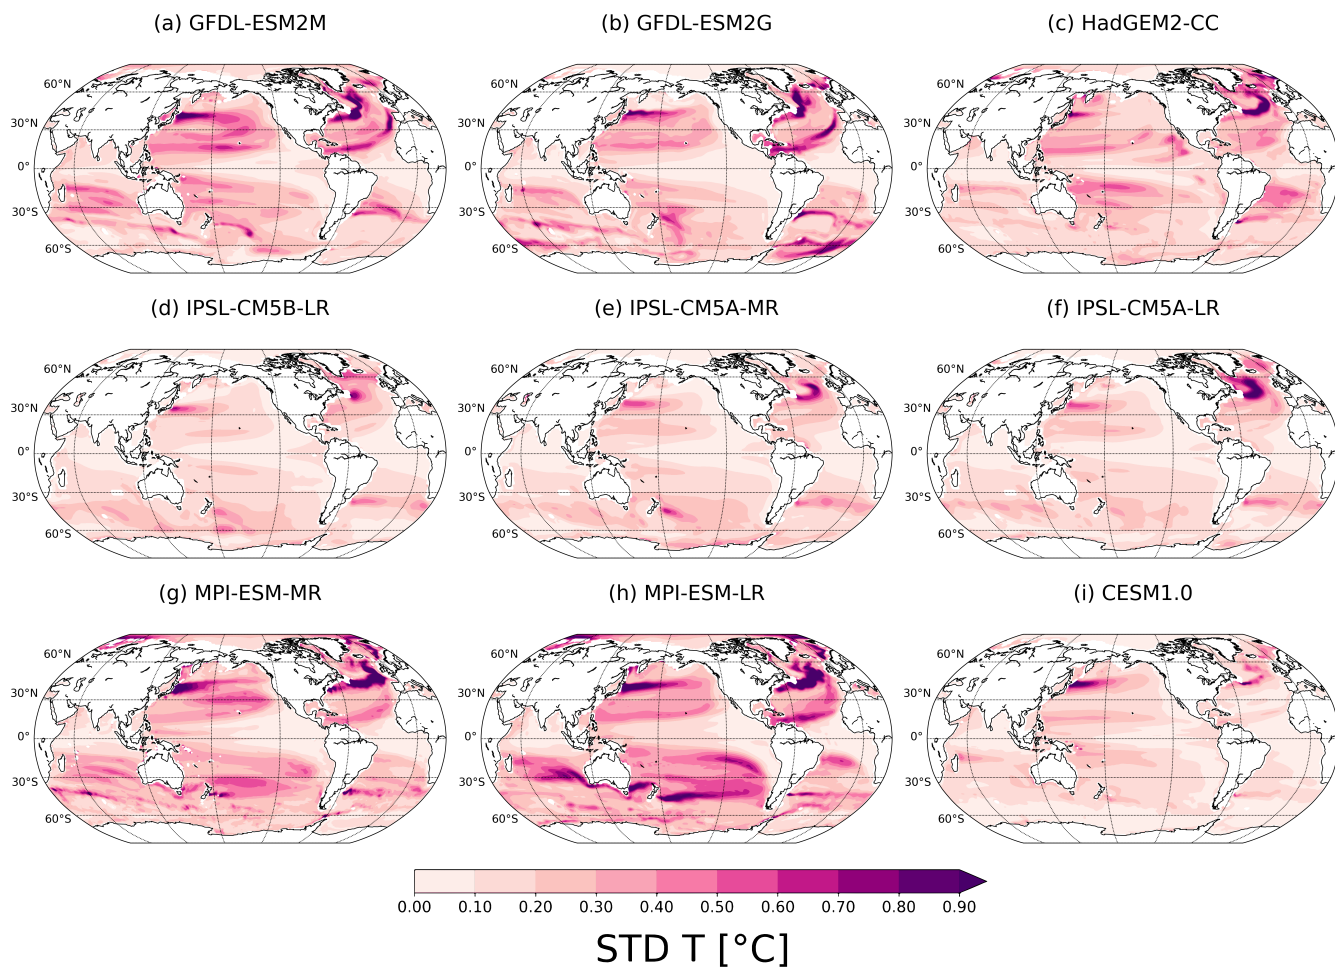

**Figure S3.** Standard deviation of temperature in the averaged layer 200 – 600 m of the associated control simulation.

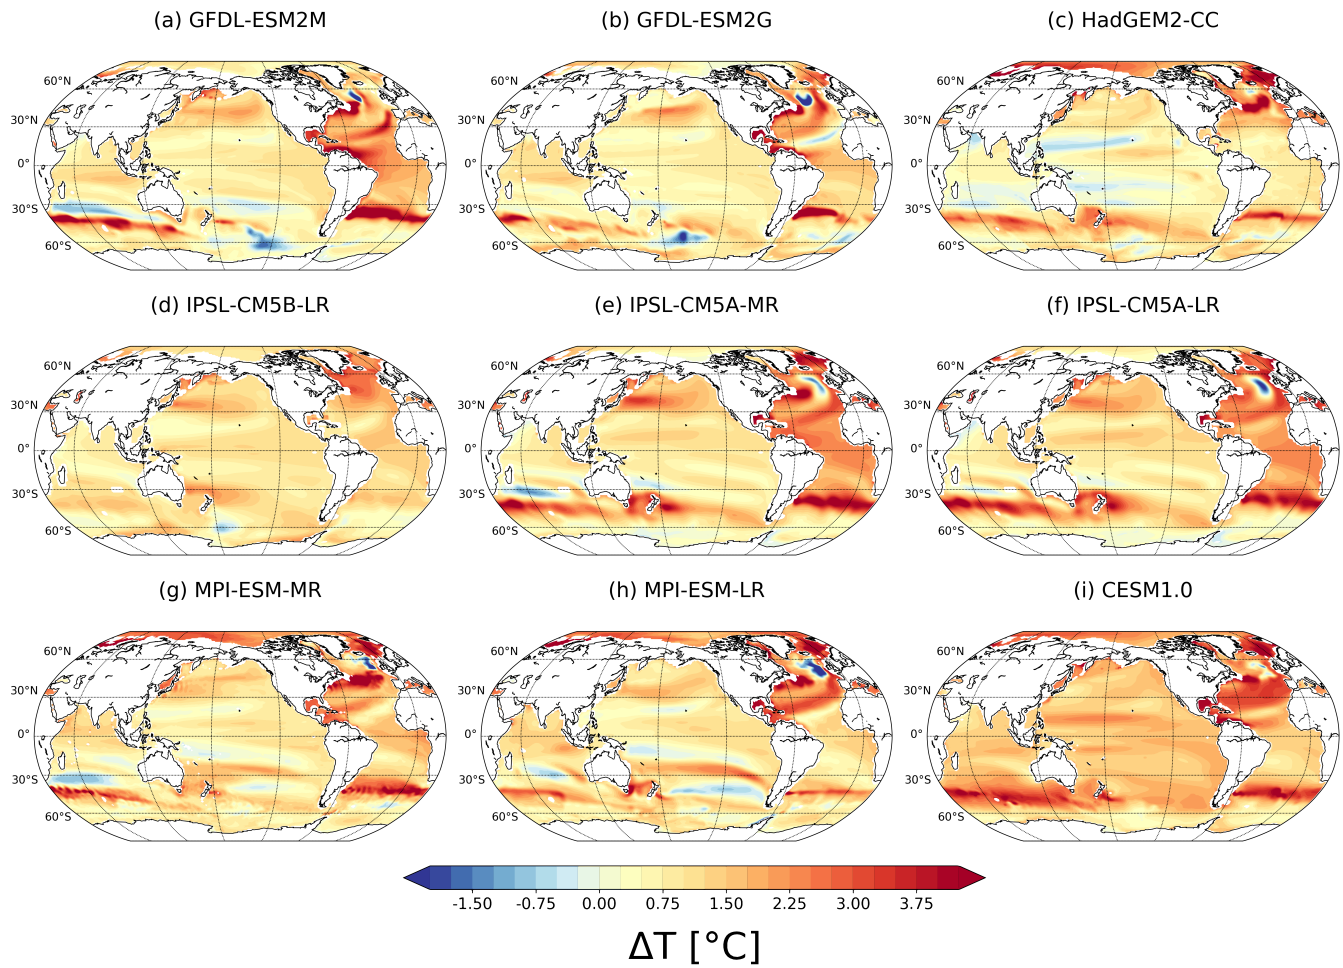

**Figure S4.** Anthropogenic changes ((2070-2099 CE) minus (1861-1959 CE)) in temperature.

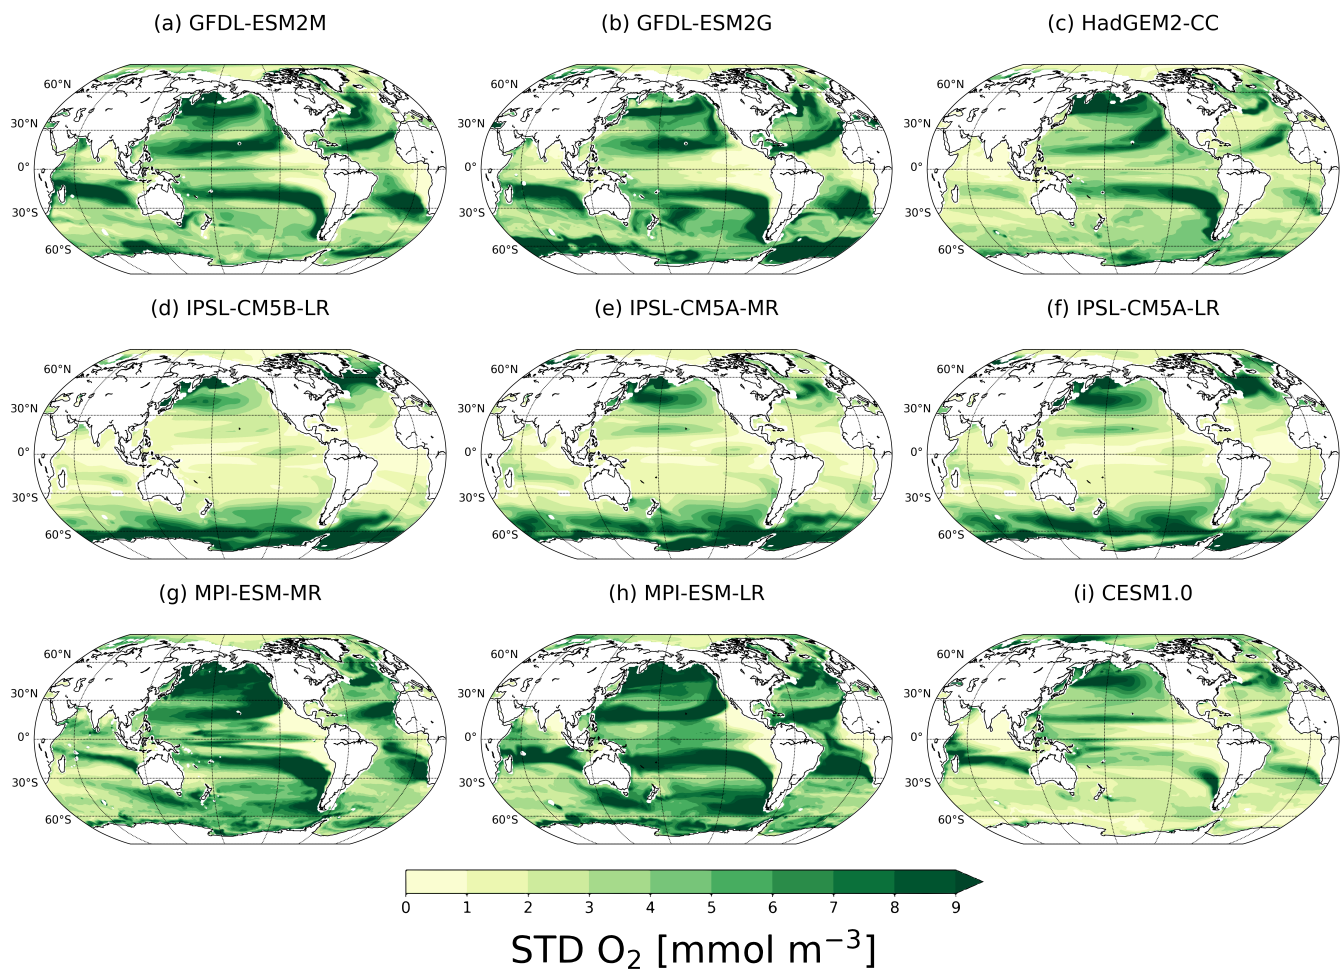

**Figure S5.** Standard deviation of O<sub>2</sub> in the averaged layer 200 – 600 m of the associated control simulation.

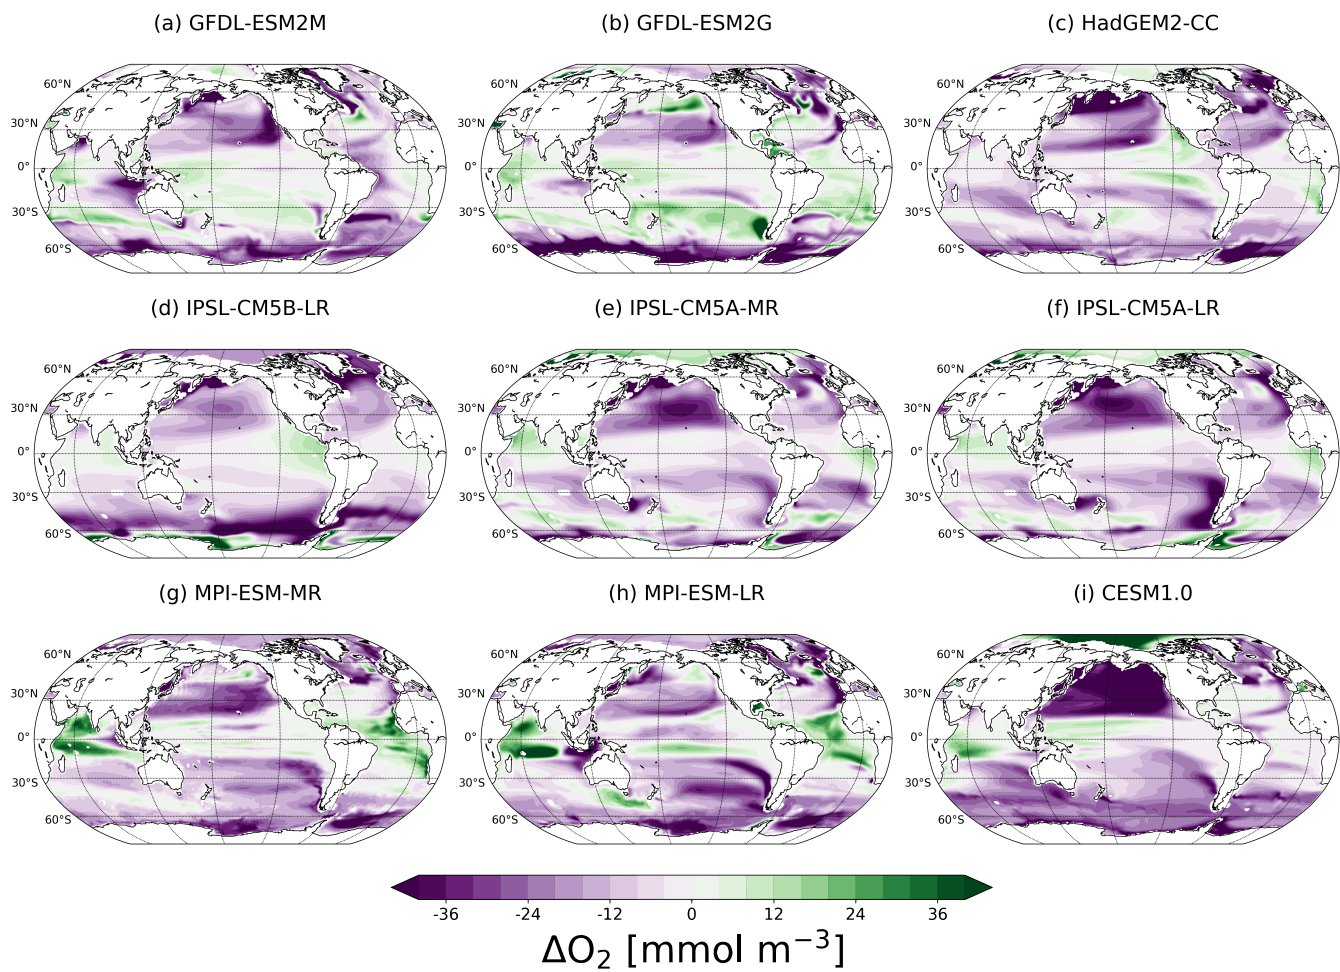

**Figure S6.** Anthropogenic changes ((2070-2099 CE) minus (1861-1959 CE)) in  $O_2$ .
